# Supplementary material for: A small-molecule organic ferroelectric with piezoelectric voltage coefficient larger than that of lead zirconate titanate and polyvinylidene difluoride
Source: Royal Society of Chemistry journal article supplement (doi:10.1039/d1sc06909h), 2022-01-01
Supplement: d1sc06909h1.pdf [file d1sc06909h1.pdf]

## Electronic Supplementary Information

### Small-Molecule Organic Ferroelectric Piezoelectric Voltage Coefficient Larger than Lead Zirconate Titanate and Polyvinylidene Difluoride

Han-Yue Zhang<sup>a,\*</sup>

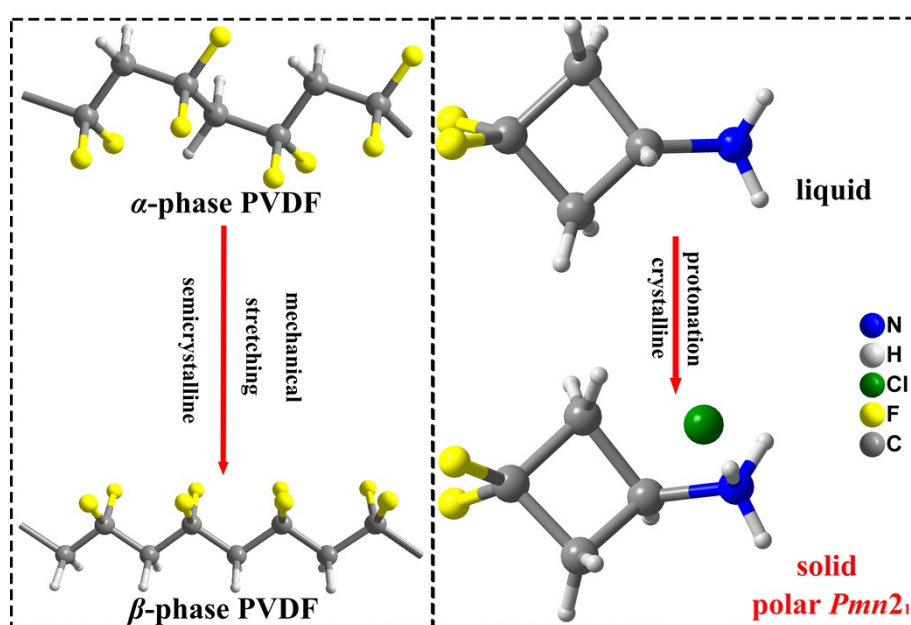

**Scheme S1.** Design strategy of (3,3-DFCBA)Cl. Comparison of the ways to obtain ferroelectric phase of the ferroelectric polymer PVDF and small-molecule ferroelectric (3,3-DFCBA)Cl.

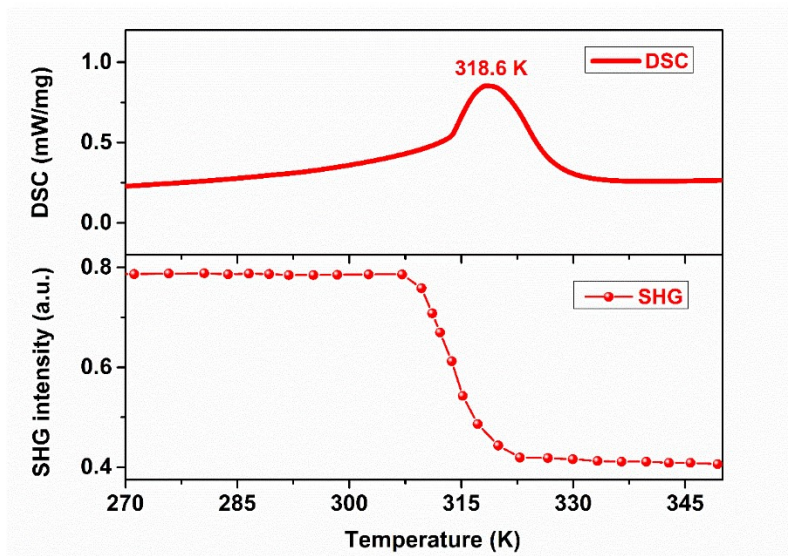

**Fig. S1.** DSC curve and temperature-dependent SHG intensity of (CBA)Cl in the heating run, showing phase transition at 318.6 K.

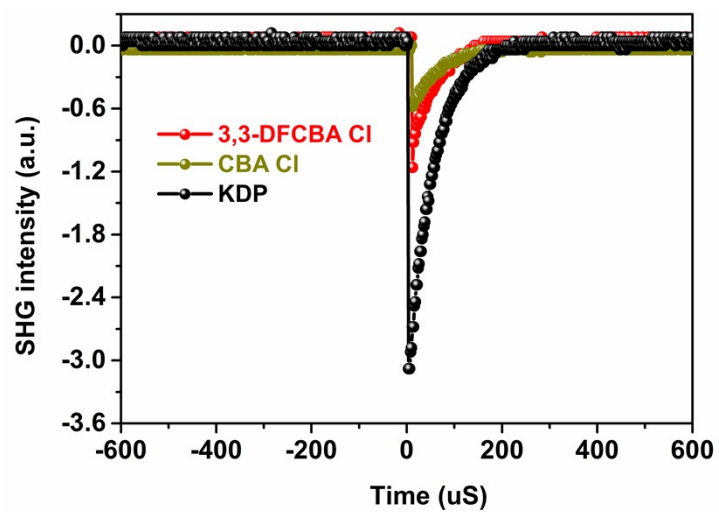

**Fig. S2.** SHG signals of (3,3-DFCBA)Cl, (CBA)Cl and KDP at room temperature.

### Calculation of polarization of (3,3-DFCBA)Cl according to a point charge model

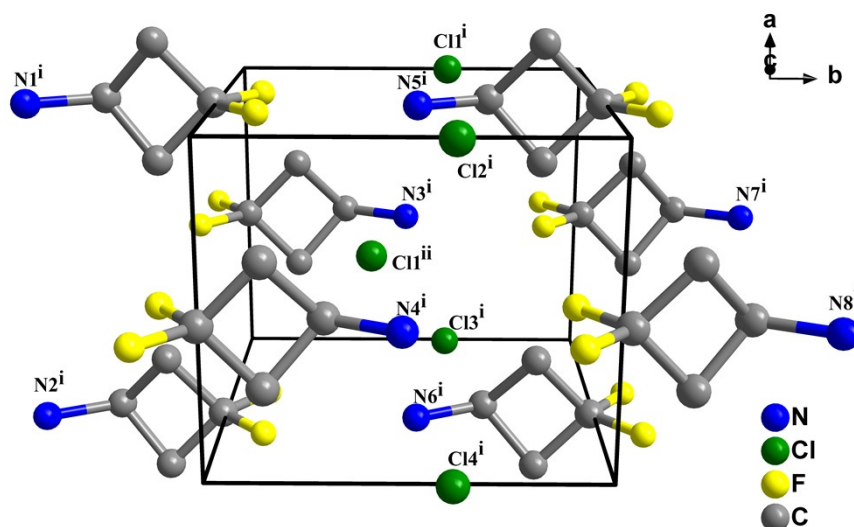

**Fig. S3.** Distribution of Cl and N atoms of (3,3-DFCBA)Cl in a unit cell.

According to the crystal structure data collected at 293 K, we select a unit cell and assume that the centers of the positive and negative charges of the (3,3-DFCBA)Cl are located on the N atoms and Cl atoms, respectively.

| Atoms | Atom coordinate                         |                                        | Coordinate of charge center |
|-------|-----------------------------------------|----------------------------------------|-----------------------------|
| N     | N1 <sup>i</sup> (1, -0.4832, 0.3944)    | N5 <sup>i</sup> (1, 0.5168, 0.3944)    | (0.5, 0.5, 0.3944)          |
|       | N2 <sup>i</sup> (0, -0.4832, 0.3944)    | N6 <sup>i</sup> (0, 0.5168, 0.3944)    |                             |
|       | N3 <sup>i</sup> (0.5, 0.4832, 0.8944)   | N7 <sup>i</sup> (0.5, 1.4832, 0.8944)  |                             |
|       | N4 <sup>i</sup> (0.5, 0.4832, -0.1056)  | N8 <sup>i</sup> (0.5, 1.4832, -0.1056) |                             |
| Cl    | Cl1 <sup>i</sup> (1, 0.6056, 0.9864)    | Cl3 <sup>i</sup> (0, 0.6056, 0.9864)   | (0.5, 0.5, 0.4864)          |
|       | Cl2 <sup>i</sup> (1, 0.6056, -0.0136)   | Cl4 <sup>i</sup> (0, 0.6056, -0.0136)  |                             |
|       | Cl1 <sup>ii</sup> (0.5, 0.3944, 0.4864) |                                        |                             |

$$P_s = \lim_{V \rightarrow \infty} \frac{1}{V} \sum q_i r_i$$

$$= (q_{Cl} \Gamma_{Cl} + q_N \Gamma_N) / V$$

$$= [(-e \times 0.4864) + (e \times 0.3944)] \times 2 \times c / V$$

$$= [-0.092 \times 2 \times 1.6 \times 10^{-19} \times 7.6493 \times 10^{-10} \text{ C m}] / (327.87 \times 10^{-30} \text{ m}^3)$$

$$= -6.9 \times 10^{-2} \text{ C m}^{-2}$$

$$|P_s| = 6.9 \times 10^{-2} \text{ C m}^{-2} = 6.9 \mu\text{C cm}^{-2}$$

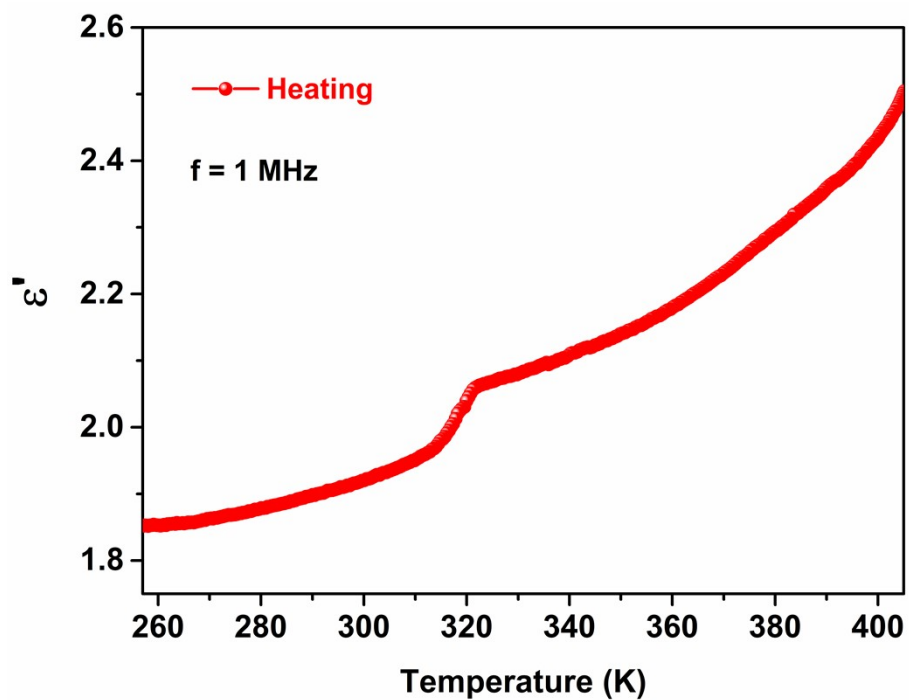

**Fig. S4.** The dependence of the real part  $\epsilon'$  of (CBA)Cl at 1 MHz for polycrystalline sample in the heating run.

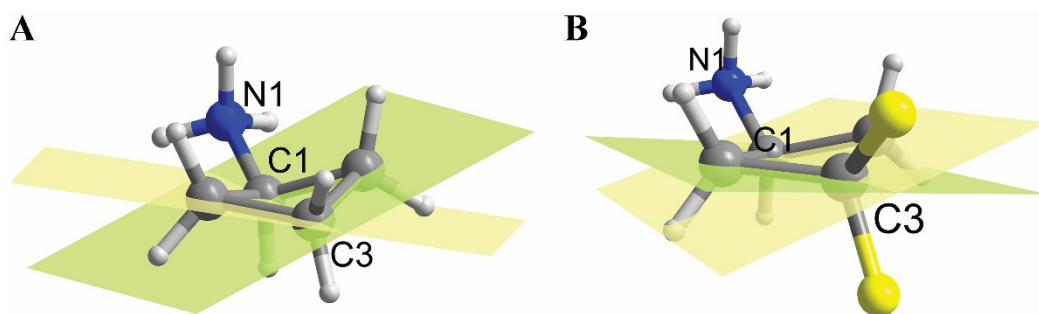

**Fig. S5.** Schematic diagram of the effect of F/H substitution on the molecular structure of CBA.

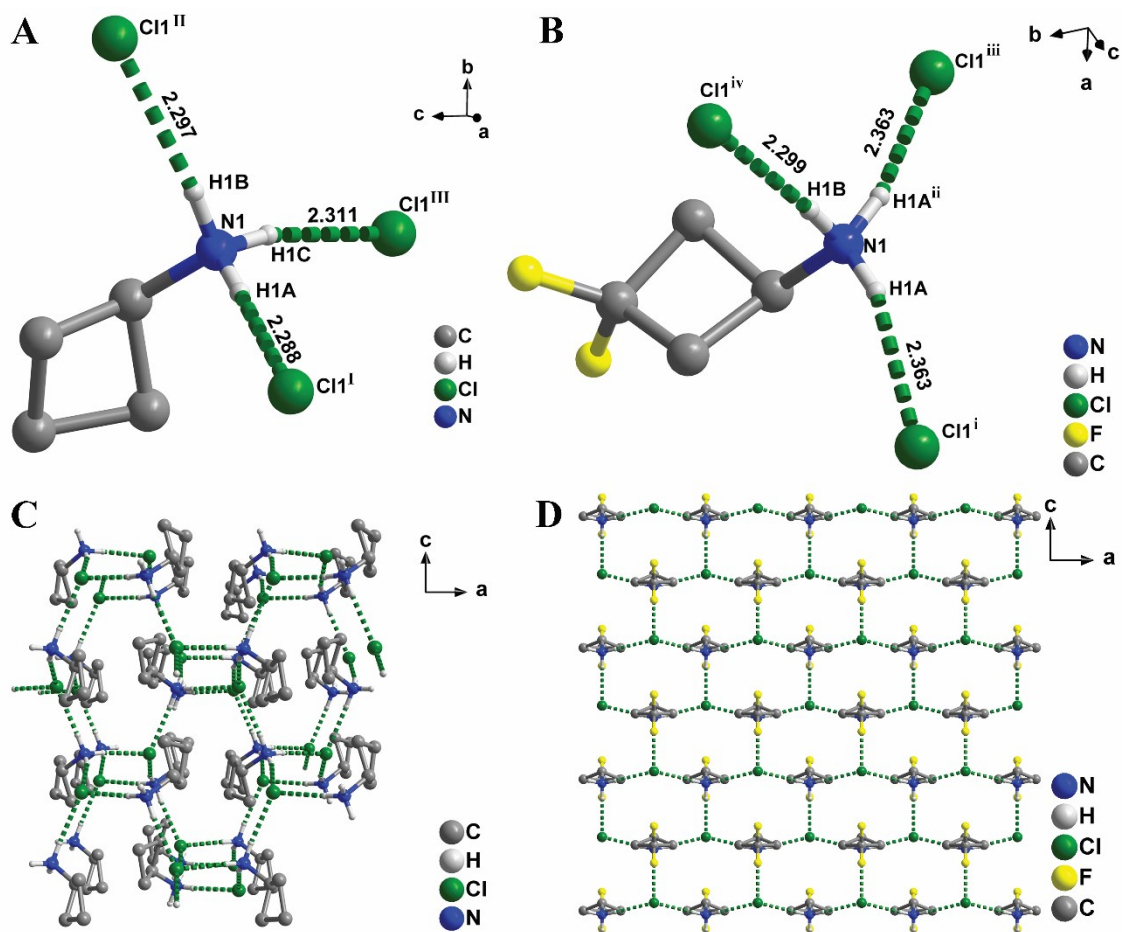

**Fig. S6.** The hydrogen bonding interactions profile of (CBA)Cl (A) and (3,3-DFCBA)Cl (B) in the LTP. And the packing views of (CBA)Cl (C) and (3,3-DFCBA)Cl (D) in the *ac* plane in the LTP. Hydrogen atoms bonded to C atoms were omitted for clarity.

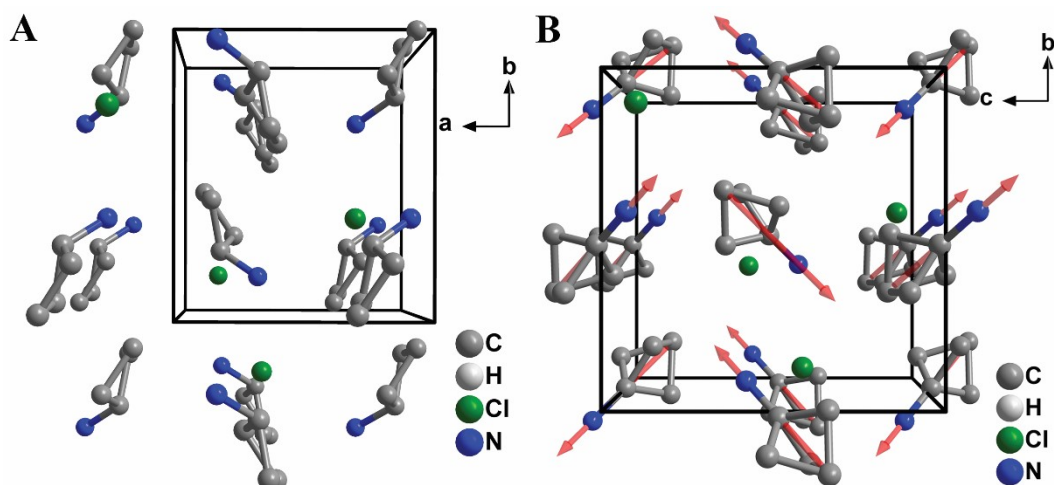

**Fig. S7.** The crystal structures of (CBA)Cl at 293 K (A) and 343 K (B), showing the similarities of crystal structures and the differences of orientation states of organic cations. The red arrow through CBA molecules represent the three-fold rotation axes. H atoms were omitted for clarity.

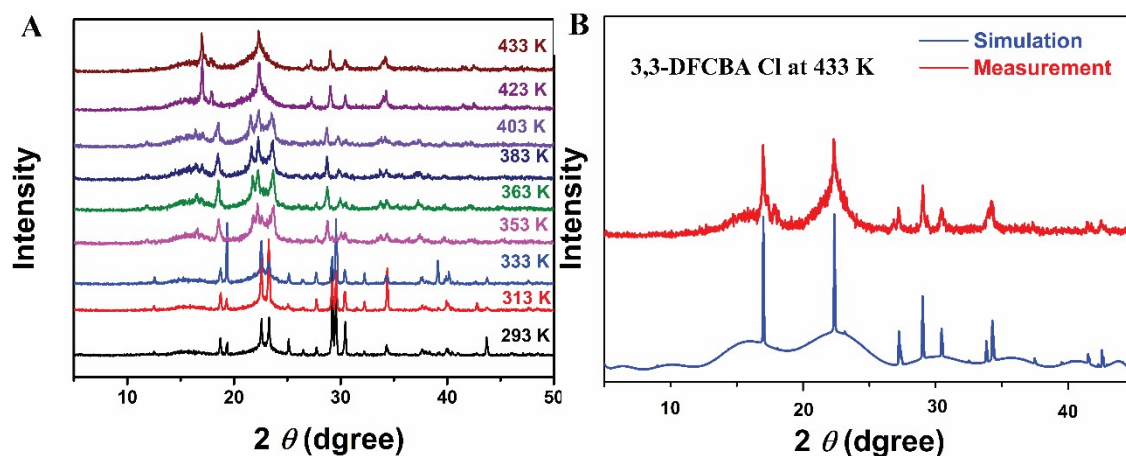

**Fig. S8.** The variable-temperature PXRD patterns of (3,3-DFCBA)Cl (A) and the pawley refinement of PXRD data of (3,3-DFCBA)Cl (B) at 433 K.



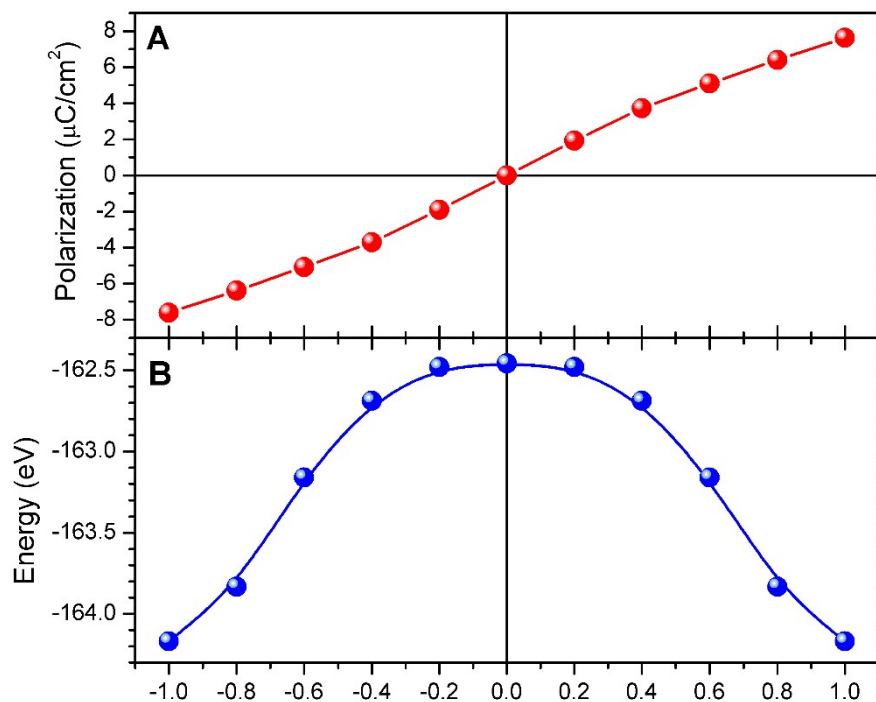

**Fig. S9.** Ferroelectric switching process of (3,3-DFCBA)Cl by DFT calculation. (A) Ferroelectric polarization evolution and (B) energy variation as a function of structure parameter  $\lambda$ .

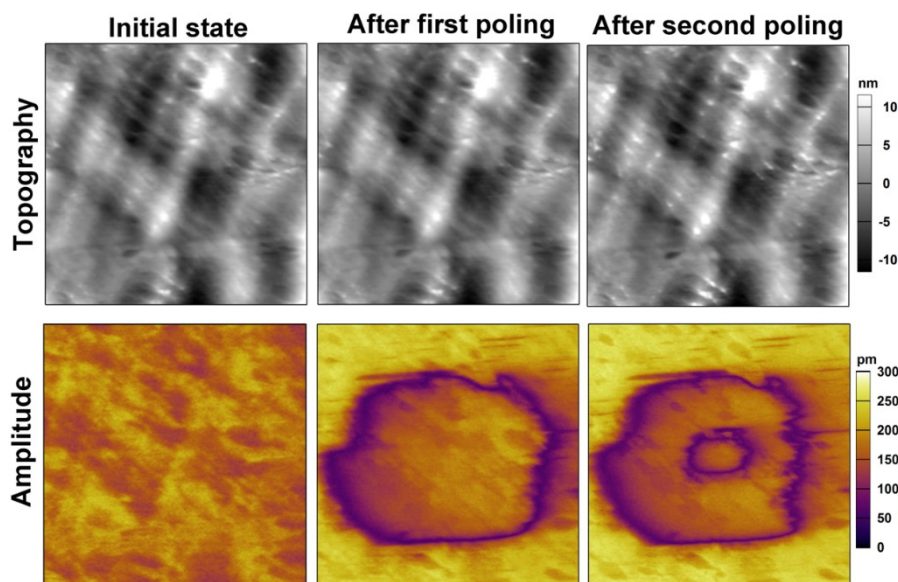

**Fig. S10.** Topography and vertical PFM amplitude images during the electric poling of the same region shown in Fig. 4G-I for the (3,3-DFCBA)Cl thin film.

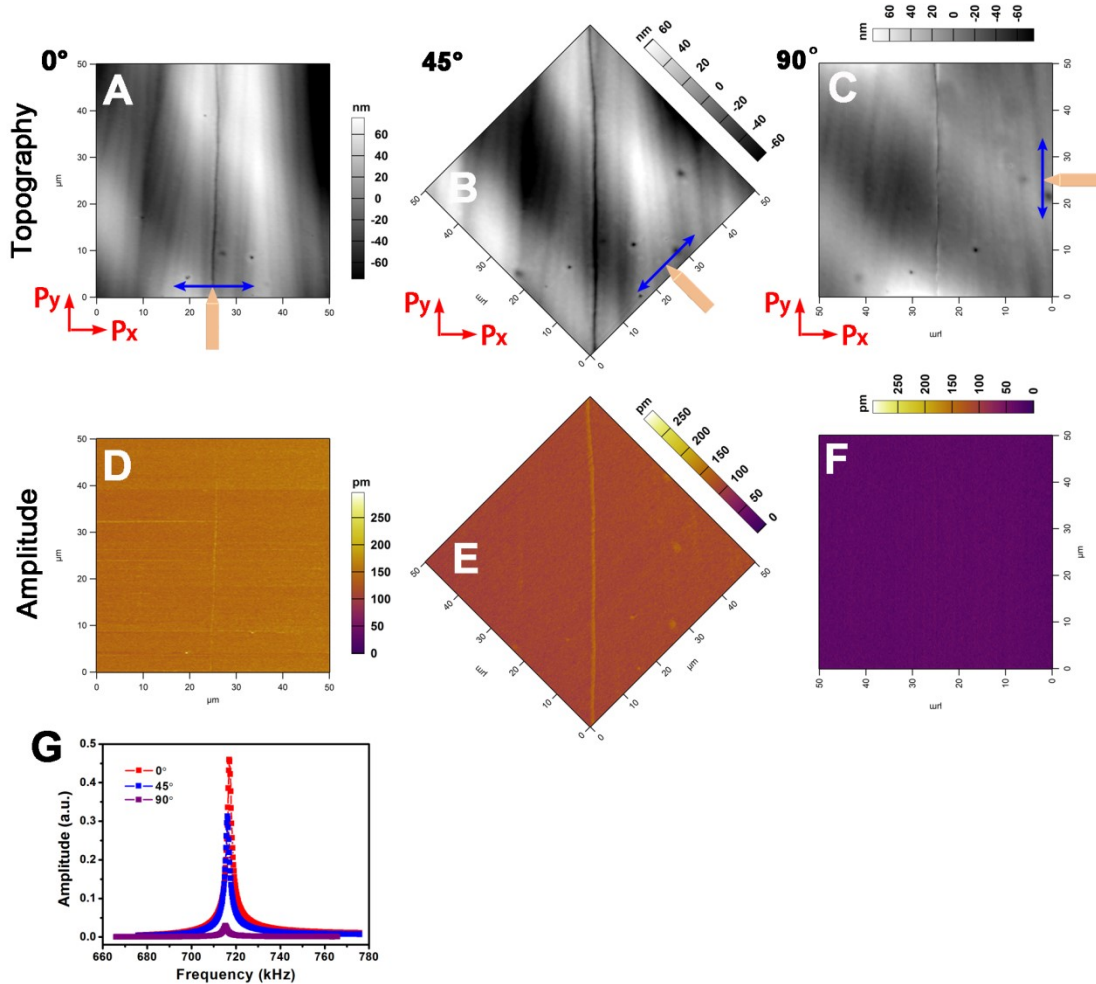

**Fig. S11.** PFM for (3,3-DFCBA)Cl thin film. (A-C) Topographic images around the selected region at rotation angles of 0°, 45° and 90°, respectively. (D-F) Corresponding lateral PFM amplitude images (drive voltage 2V). (G) Amplitude as a function of frequency for the film at rotation angles of 0°, 45° and 90° (drive voltage 2V). The insets in A, B and C are the PFM cantilever and the scanning direction.

With the probing ac field, the in-plane component of the polarization gives rise to local vibration in the lateral direction, which was monitored by PFM cantilever twisting or torsion (lateral PFM).

The lateral PFM amplitude signal is proportional to  $P_{//}\sin\theta$  (where  $P_{//}$  is the in-plane polarization



component,  $\theta$  is the alignment angle between the cantilever axis and  $P_{//}$ ). We firstly performed angular-resolved PFM by rotating the sample with respect to the cantilever axis. We set the rotation angle is  $0^\circ$  where the lateral PFM of the film is strongest, and the measured in-plane polarization component was set as  $P_x$  (fig. S11A and D). Thus the piezoelectric response comes from piezoelectric coefficient  $d_{31}$ . Fig. S11E and F display the lateral PFM amplitude images at rotation angles of  $45^\circ$  and  $90^\circ$ , respectively. The amplitude represents a moderate signal at rotation angle of  $45^\circ$  and a weak signal at rotation angle of  $90^\circ$ . Fig. S11G shows the amplitude against the frequency for the film at rotation angles of  $0^\circ$ ,  $45^\circ$  and  $90^\circ$  under drive voltage of 2 V. Again, the resonance shows a same relative magnitude.

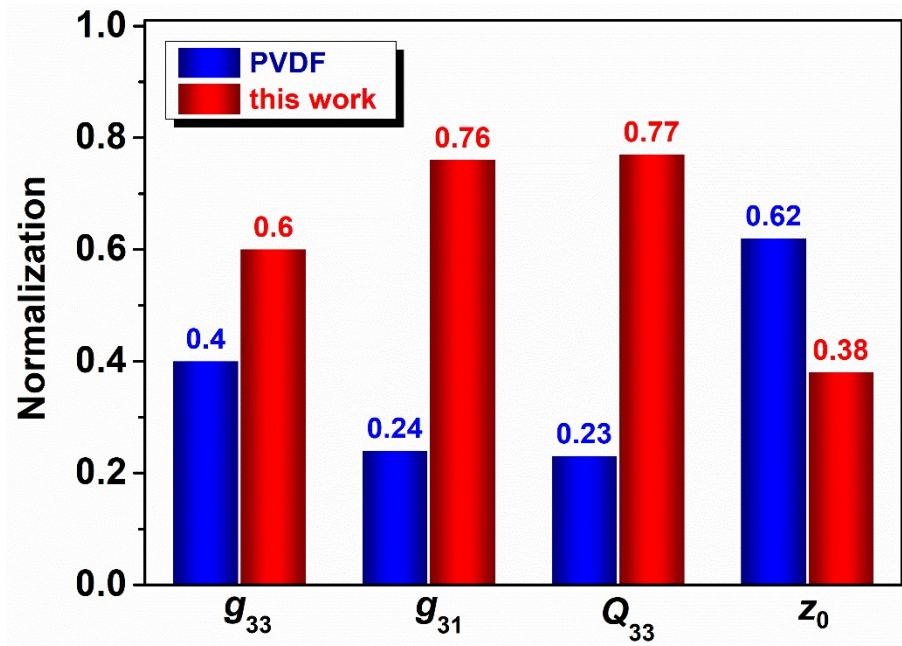

**Fig. S12.** Comparison of piezoelectric voltage coefficient  $g_{33}$ ,  $g_{31}$  and  $Q_{33}$ , and acoustic impedance  $z_0$  between ferroelectric polymer PVDF and (3,3-DFCBA)Cl thin films.

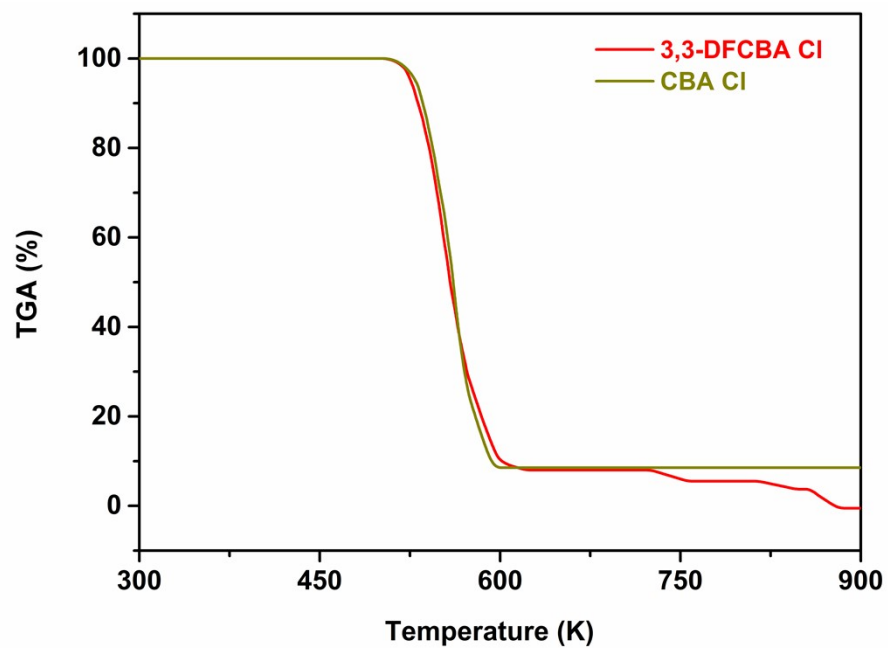

**Fig. S13.** Thermogravimetric analysis (TGA) curves of (3,3-DFCBA)Cl and (CBA)Cl, respectively.

**Table S1.** Comparison of (CBA)Cl and (3,3-DFCBA)Cl for various physical properties.

| Compound               | (CBA)Cl                  | (3,3-DFCBA)Cl                            |
|------------------------|--------------------------|------------------------------------------|
| $\varepsilon'$ (1 kHz) | 2.6                      | 7.88                                     |
| $T_c$                  | 318.6 K                  | 374.4 K, 426 K                           |
| Aizu notation          | 23F222                   | 4/ <i>mmmFmm</i> 2                       |
| Piezoelectric constant | $d_{11}, d_{25}, d_{36}$ | $d_{31}, d_{32}, d_{33}, d_{24}, d_{15}$ |

**Table S2.** Crystal data and structure refinements for (CBA)Cl and (3,3-DFCBA)Cl at various temperatures.

| Compound                    | (CBA)Cl                                               | (3,3-DFCBA)Cl                      |                                                  |
|-----------------------------|-------------------------------------------------------|------------------------------------|--------------------------------------------------|
| Temperature                 | 293 K                                                 | 343 K                              | 293 K                                            |
| Formula                     | C <sub>4</sub> H <sub>10</sub> NCl                    | C <sub>4</sub> H <sub>10</sub> NCl | C <sub>4</sub> H <sub>8</sub> F <sub>2</sub> NCl |
| Formula weight              | 107.58                                                | 107.58                             | 143.56                                           |
| Crystal system              | orthorhombic                                          | cubic                              | orthorhombic                                     |
| Space group                 | <i>P</i> 2 <sub>1</sub> 2 <sub>1</sub> 2 <sub>1</sub> | <i>P</i> 2 <sub>1</sub> 3          | <i>Pmn</i> 2 <sub>1</sub>                        |
| $a, b, c$ (Å)               | 7.8522(6)                                             | 8.5648(3)                          | 6.0473(4)                                        |
|                             | 8.8201(6)                                             | 8.5648(3)                          | 7.0878(5)                                        |
|                             | 8.9227(6)                                             | 8.5648(3)                          | 7.6493(5)                                        |
| $\alpha, \beta, \gamma$ (°) | 90                                                    | 90                                 | 90                                               |
|                             | 90                                                    | 90                                 | 90                                               |
|                             | 90                                                    | 90                                 | 90                                               |
| Volume /Å <sup>3</sup>      | 617.96(8)                                             | 628.28(7)                          | 327.87(4)                                        |
| $Z$                         | 4                                                     | 4                                  | 2                                                |
| Density/g cm <sup>-3</sup>  | 1.156                                                 | 1.137                              | 1.454                                            |
| $R_1$                       | 0.0512                                                | 0.0886                             | 0.0348                                           |
| $wR_2$                      | 0.1521                                                | 0.3194                             | 0.0851                                           |
| GOF                         | 1.071                                                 | 1.076                              | 1.073                                            |

**Table S3.** The contrast of molecular structure distortion for (CBA)Cl and (3,3-DFCBA)Cl.

| Compound        | (CBA)Cl | (3,3-DFCBA)Cl |
|-----------------|---------|---------------|
| plane angle (°) | 32.677  | 22.664        |
| <N1-C1-C3 (°)   | 146.049 | 139.567       |

**Table S4.** Hydrogen-bond geometry (Å, °) for (CBA)Cl and (3,3-DFCBA)Cl.

| Compound                  | <i>D</i> —H··· <i>A</i>                    | H··· <i>A</i> | <i>D</i> ··· <i>A</i> | < <i>D</i> —H··· <i>A</i> |
|---------------------------|--------------------------------------------|---------------|-----------------------|---------------------------|
| (CBA)Cl<br>at 293 K       | N1-H1A···C11 <sup>I</sup>                  | 2.29 (2)      | 3.18 (2)              | 174.00 (2)                |
|                           | N1-H1B···C11 <sup>II</sup>                 | 2.30 (2)      | 3.17 (2)              | 166.95 (2)                |
|                           | N1-H1C···C11 <sup>III</sup>                | 2.31 (2)      | 3.18 (2)              | 167.11 (2)                |
| (CBA)Cl<br>at 343 K       | N1-H1A···C11 <sup>α</sup>                  | 2.37 (2)      | 3.17 (2)              | 146.87 (2)                |
|                           | N1-H1B···C11 <sup>β</sup>                  | 2.38 (2)      | 3.17 (2)              | 146.69 (2)                |
|                           | N1-H1C···C11 <sup>γ</sup>                  | 2.37 (2)      | 3.17 (2)              | 146.64 (2)                |
| (3,3-DFCBA)Cl<br>at 293 K | N1-H1A···C11 <sup>i</sup>                  | 2.36 (1)      | 3.22 (1)              | 162.54 (2)                |
|                           | N1-H1A <sup>ii</sup> ···C11 <sup>iii</sup> | 2.36 (1)      | 3.22 (1)              | 162.54 (2)                |
|                           | N1-H1B···C11 <sup>iv</sup>                 | 2.30 (1)      | 3.18 (1)              | 175.72 (2)                |

Symmetry codes: (I)  $x+1, y, z$ ; (II)  $-x+1, y+1/2, -z+1/2$ ; (III)  $x+1/2, -y+3/2, -z$ ; ( $\alpha$ )  $x+1/2, -y+3/2, -z$ ; ( $\beta$ )  $x+1, y, z$ ; ( $\gamma$ )  $-x+3/2, -y+1, z-1/2$ ; (i)  $-x+1/2, -y+1, z-1/2$ ; (ii)  $-x, y, z$ ; (iii)  $-x-1/2, -y+1, z-1/2$ ; (iv)  $x, y, z-1$ .

**Table S5.** Piezoelectric voltage coefficient of (3,3-DFCBA)Cl compared with some inorganic single crystals, textured ceramics, polymer, and molecular ferroelectrics including BTO, 0.99KNNLN<sub>0.87</sub>ST<sub>0.1</sub>-0.01CZ ceramic (KNN-ceramic), 0.71PMN-0.29Pt (PMNT29), Pb(Mg<sub>1/3</sub>Nb<sub>2/3</sub>)O<sub>3</sub>-PbZrO<sub>3</sub>-PbTiO<sub>3</sub> (PMN-PZT), (K<sub>0.5</sub>Na<sub>0.5</sub>)-(Nb<sub>0.97</sub>Sb<sub>0.03</sub>)O<sub>3</sub> ceramics (Textured-KNNS), Sm and Mn-modified PT ceramic (SM-PT), triglycine sulfatate (TGS), croconic acid (CA), diisopropylammonium bromide (DIPAB), PVDF, and so on. TPAP = triphenyl isopropylaminophosphonium, DPDP = diphenyl diisopropylaminophosphonium, TIAP = tetraisopropylaminophosphonium, FF = diphenylalanine, Dip =  $\beta,\beta$ -diphenyl-Ala-OH, Boc = tert-butylloxycarbonyl, 4,4'-Bpy = 4,4'-bipyridine, AcA = *N*-acetyl-L-alanine.

| Samples                           | $\epsilon_r$ | $d_{33}$ (pC N <sup>-1</sup> ) | $g_{33}$ (10 <sup>-3</sup> VmN <sup>-1</sup> ) | Ref.             |
|-----------------------------------|--------------|--------------------------------|------------------------------------------------|------------------|
| Textured-KNNS                     | 382          | 208                            | 61.5                                           | (54)             |
| KNN-basd ceramic                  | 1027         | 275                            | 30.26                                          | (11)             |
| Sm,Mn-doped PbTiO <sub>3</sub>    | 196          | 59                             | 34                                             | (55)             |
| PbTiO <sub>3</sub> single crystal | 126          | 143                            | 129                                            | (56)             |
| BTO ceramic                       | 1892         | 191                            | 11.4                                           | (57)             |
| BTO single crystal                | 168          | 85.6                           | 57.6                                           | (57)             |
| PZT                               | 730          | 220                            | 34                                             | (58)             |
| PMNT29                            | 5400         | 1500                           | 31.37                                          | (59)             |
| PMN-PZT                           | 4850         | 1530                           | 35.63                                          | (59)             |
| SM-PT                             | 124          | 127                            | 115                                            | (60)             |
| PVDF                              | 13           | 33                             | 286.7                                          | (61)             |
| TGS                               | 67           | 22                             | 37.1                                           | (34)             |
| CA                                | 12           | 5                              | 47.1                                           | (34, 62)         |
| DIPAB                             | 80           | 11                             | 15.5                                           | (34, 29)         |
| TPAP·BF <sub>4</sub>              | 9.28         | 3                              | 36.5                                           | (48)             |
| TPAP·ClO <sub>4</sub>             | 16.21        | 4                              | 27.87                                          | (48)             |
| DPDP·BF <sub>4</sub>              | 7.26         | 7                              | 108.9                                          | (48)             |
| DPDP·ClO <sub>4</sub>             | 9.08         | 12                             | 149.3                                          | (48)             |
| DPDP·IO <sub>4</sub>              | 8.75         | 8                              | 103.3                                          | (48)             |
| TIAP·BF <sub>4</sub>              | 16.67        | 3                              | 20.3                                           | (48)             |
| TIAP·ClO <sub>4</sub>             | 16.88        | 3                              | 20.1                                           | (48)             |
| Boc-Dip-Dip                       | 3-4          | 73.1 ± 13.1                    | 2000-3000                                      | (49)             |
| Boc-FF                            | -            | 8.4 ± 1.7                      | -                                              | (49)             |
| FF                                | -            | 18                             | -                                              | (49)             |
| 4,4'-Bpy                          | 3.13         | 20.9                           | 1150                                           | (50)             |
| AcA                               | 2.24         | 9.5                            | 480                                            | (50)             |
| 4,4'-Bpy/AcA                      | 2.51         | 14.9                           | 670                                            | (50)             |
| DPDP·PF <sub>6</sub>              | -            | 8                              | -                                              | (53)             |
| <b>(3,3-DFCBA)Cl</b>              | <b>7.88</b>  | <b>30.5</b>                    | <b>437.2</b>                                   | <b>This work</b> |





**Table S6.** The value of acoustic impedance  $z_0$  measured on different ferroelectric samples.

| Ferroelectrics                                                     | $\rho$<br>$10^3 \text{ kg m}^{-3}$ | $c$<br>$10^3 \text{ m s}^{-1}$ | Measured $z_0$<br>$10^6 \text{ kg s}^{-1} \text{ m}^{-2}$ | Reference $z_0$<br>$10^6 \text{ kg s}^{-1} \text{ m}^{-2}$ | Source                                                                                                                                              |
|--------------------------------------------------------------------|------------------------------------|--------------------------------|-----------------------------------------------------------|------------------------------------------------------------|-----------------------------------------------------------------------------------------------------------------------------------------------------|
| PZT<br>( $\text{Pb}(\text{Zr}_{0.52}\text{Ti}_{0.48})\text{O}_3$ ) | 7.50                               | 3.39                           | 25.39                                                     | 30 (63)                                                    | Purchased from Hefei Ke Jing Materials Technology Co., Ltd.<br><a href="http://www.kjmti.com/">http://www.kjmti.com/</a>                            |
| BTO                                                                | 5.30                               | 3.97                           | 21.05                                                     | 22.0-32.7 (64)                                             | Purchased from Hefei Ke Jing Materials Technology Co., Ltd.<br><a href="http://www.kjmti.com/">http://www.kjmti.com/</a>                            |
| LNO ( $\text{LiNbO}_3$ )                                           | 4.34                               | 10.06                          | 43.64                                                     | 19.55 (64)                                                 | Purchased from Hefei Ke Jing Materials Technology Co., Ltd.<br><a href="http://www.kjmti.com/">http://www.kjmti.com/</a>                            |
| Rochelle salt                                                      | 1.79                               | 4.21                           | 7.54                                                      | 5.49 (64)                                                  | Prepared by ourselves according to the literature (65)                                                                                              |
| PVDF                                                               | 1.78                               | 2.39                           | 4.25                                                      | 3.92 (64),<br>3.9 (66)                                     | Purchased from MEAS, USA<br><a href="http://www.te.com/usa-en/products/families/meas.html">http://www.te.com/usa-en/products/families/meas.html</a> |
| PVDF                                                               | 1.63                               | 2.26                           | 3.69                                                      |                                                            | Prepared by ourselves by hot press molding                                                                                                          |
| TGS                                                                | 1.69                               | 5.76                           | 9.74                                                      |                                                            | Prepared by ourselves according to the literature (67)                                                                                              |
| DIPAB                                                              | 1.34                               | 3.27                           | 4.39                                                      |                                                            | Prepared by ourselves according to the literature (29)                                                                                              |
| <b>(3,3-DFCBA)Cl</b>                                               | <b>1.19~1.45</b>                   | <b>1.55~2.55</b>               | <b>2.25~3.26</b>                                          |                                                            | <b>This work</b>                                                                                                                                    |

Acoustic impedance and specific acoustic impedance are measures of the opposition that a system presents to the acoustic flow resulting from an acoustic pressure applied to the system. Specific acoustic impedance  $z$  is an intensive property of a particular material. The absolute value of this specific acoustic impedance is often called “characteristic specific acoustic impedance” and denoted  $z_0$ :

$$z_0 = \rho c$$

where  $\rho$  is the volumetric mass density of the material,  $c$  is the speed of the sound waves traveling in the material.

All measurements were done in our lab using Ultrasonic Sound Velocity Testing Device (CGN Inspection Technology Co., Ltd. China) via “Density-Speed” method described above. All samples were immersed in silicone oil as medium at room temperature during the measurements.

### **Dielectric permittivity and piezoelectric coefficient matrix**

Considering the point group  $mm2$  of (3,3-DFCBA)Cl in its ferroelectric phase, the dielectric constant matrix  $[\epsilon]$  can be written as:

$$\begin{bmatrix} \epsilon_{11} & 0 & 0 \\ 0 & \epsilon_{22} & 0 \\ 0 & 0 & \epsilon_{33} \end{bmatrix}$$

the piezoelectric constant matrix  $[d]$  can be written as:

$$\begin{bmatrix} 0 & 0 & 0 & 0 & d_{15} & 0 \\ 0 & 0 & 0 & d_{24} & 0 & 0 \\ d_{31} & d_{32} & d_{33} & 0 & 0 & 0 \end{bmatrix}$$

The element  $d_{33}$  is the longitudinal piezoelectric coefficient, which characterizes the volume change as response to an applied electric field in the same direction.

Considering the point group  $222$  of ((CBA)Cl) in its room-temperature phase, the piezoelectric constant matrix  $[d]$  can be written as:

$$\begin{bmatrix} 0 & 0 & 0 & d_{14} & 0 & 0 \\ 0 & 0 & 0 & 0 & d_{25} & 0 \\ 0 & 0 & 0 & 0 & 0 & d_{36} \end{bmatrix}$$

### **Reference:**

49. R. King-Smith and D. Vanderbilt, *Phys. Rev. B*, 1993, **47**, 1651.
50. D. Vanderbilt and R. King-Smith, *Phys. Rev. B*, 1993, **48**, 4442.
51. G. Kresse and J. Furthmüller, *Phys. rev. B*, 1996, **54**, 11169.
52. G. Kresse and J. Furthmüller, *Comput. Mater. Sci.*, 1996, **6**, 15-50.
53. J. P. Perdew, K. Burke and M. Ernzerhof, *Phys. rev. lett.*, 1996, **77**, 3865.
54. Y. Chang, S. F. Poterala, Z. Yang, S. Trolier-McKinstry, G. L. Messing, *Appl. Phys. Lett.*, 2009, **95**, 232905.
55. S. Ikegami, I. Ueda, T. Nagata, *J. Acoust. Soc. Am.*, 1971, **50**, 1060-1066.
56. T. Suwannasiri, A. Safari, *J. Am. Ceram. Soc.*, 1993, **76**, 3155-3158.
57. R. E. Newnham, L. J. Bowen, K. A. Klicker, L. E. Cross, *Mater. Des.*, 1980, **2**, 93-106.
58. C. A. Randall, N. Kim, J.-P. Kucera, W. Cao, T. R. Shrout, *J. Am. Ceram. Soc.*, 1998, **81**, 677-688.
59. S. Zhang, S.-M. Lee, D.-H. Kim, H.-Y. Lee, T. R. Shrout, *J. Appl. Phys.*, 2007, **102**, 114103.
60. Y. Yan, J. E. Zhou, D. Maurya, Y. U. Wang, S. Priya, *Nat. Commun.*, 2016, **7**, 13089.
61. M. Li, H. J. Wondergem, M.-J. Spijkman, K. Asadi, I. Katsouras, P. W. M. Blom, D. M. de Leeuw, *Nat. Mater.*, 2013, **12**, 433-438.
62. S. Horiuchi, Y. Tokunaga, G. Giovannetti, S. Picozzi, H. Itoh, R. Shimano, R. Kumai, Y. Tokura, *Nature*, 2010, **463**, 789-792.
63. P. P. L. Regtien, *Sensors for Mechatronics*. (Elsevier, 2012).
64. Y. Li, Z.-K Qin, Z.-Y Zhou, *Measurement of piezoelectric and ferroelectric materials*. (Science Press, Beijing, 1984).
65. J. Curie, P. Curie, C. R. *Acad. Sci. Paris*, 91, 294-297 (1880).
66. F. S. Foster, K. A. Harasiewicz, M. D. Sherar, *IEEE Trans. Ultrason., Ferroelect., Freq. Contr.*, 2000, **47**, 1363-1371.
67. S. Hoshino, T. Mitsui, F. Jona, R. Pepinsky, *Phys. Rev.*, 1957, **107**, 1255.
